# Supplementary material for: Transient auditory nerve demyelination as a new mechanism for hidden hearing loss
Source: PubMed Central journal article supplement (PMC5321746; doi:10.1038/ncomms14487), 2017-02-17
Supplement: ncomms14487-s1.pdf [file ncomms14487-s1.pdf]

## Supplementary Information

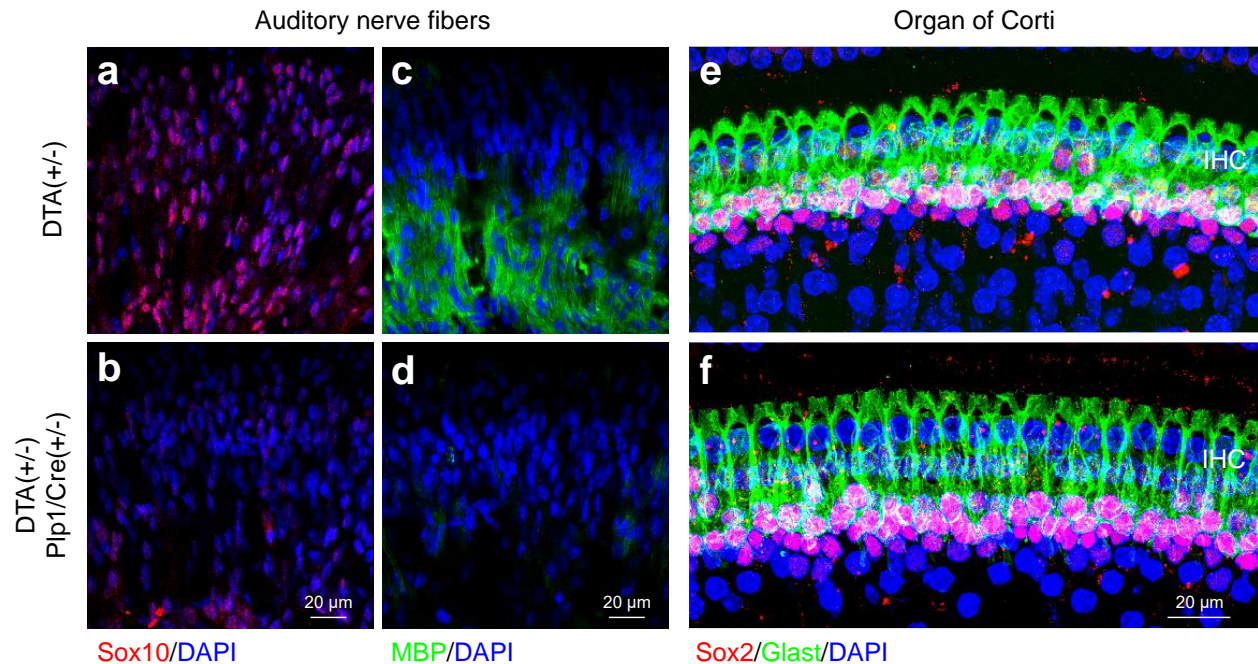

### Supplementary Figure 1: Conditional DTA expression in *Plp1*-expressing cells of the mature cochlea leads to ablation of Schwann cells but not supporting cells.

*DTA(+/-):Plp1/Cre(+/-)* and control mice were injected intraperitoneally with tamoxifen P21-23 and cochlear tissues were analyzed at P30. (a,b) Tamoxifen injection induces loss of expression of the Schwann cell marker Sox10 along the auditory nerve fibers in *DTA(+/-):Plp1/Cre(+/-)* (b) but not in control mice (a). (c,d) Tamoxifen injection induces loss of MBP expression along auditory nerve fibers in *DTA(+/-):Plp1/Cre(+/-)*(d) but not in control mice (c). (e,f) Tamoxifen injection P21-23 does not induce supporting cell loss in *DTA(+/-):Plp1/Cre(+/-)* mice. Sox2 and Glast were used as markers for the supporting cells (IPhC/IBCs) surrounding the IHCs.

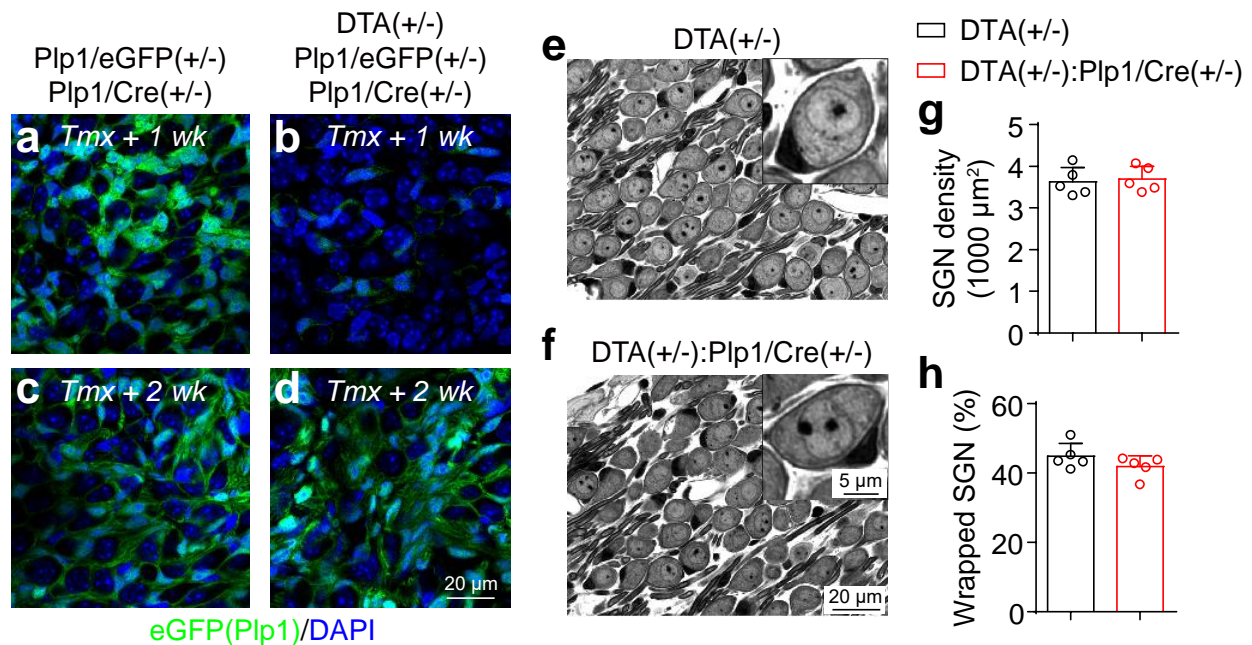

**Supplementary Figure 2: Satellite cells are ablated and completely regenerated in**

***DTA(+/-):Plp1/Cre(+/-)* mice.** (a,b) *Plp1*-expressing satellite cells marked by *Plp1/eGFP* are lost within 1 week after tamoxifen induction in *DTA(+/-):Plp1/eGFP(+/-):Plp1/Cre(+/-)* cochlea. (c,d) Satellite cells repopulate 2 weeks after tamoxifen induction. (e-h) SGN density and wrapping by satellite cells are normal at 16 weeks after DTA expression. (e,f) Light microscopic images of plastic sections through the spiral ganglion shows SGN cell bodies and their associated satellite cells in control (e) and *DTA(+/-):Plp1/Cre(+/-)* (f) cochlea. The inserts show high magnification views of single SGN cell body wrapped by optically-dense satellite cell. (g,h) Quantitative analysis shows that the density of SGN cell bodies (g) and the percentage of SGN cell bodies wrapped by satellite cells (h) are similar between *DTA(+/-):Plp1/Cre(+/-)* and control cochlea.  $n = 6$  of each animal group.

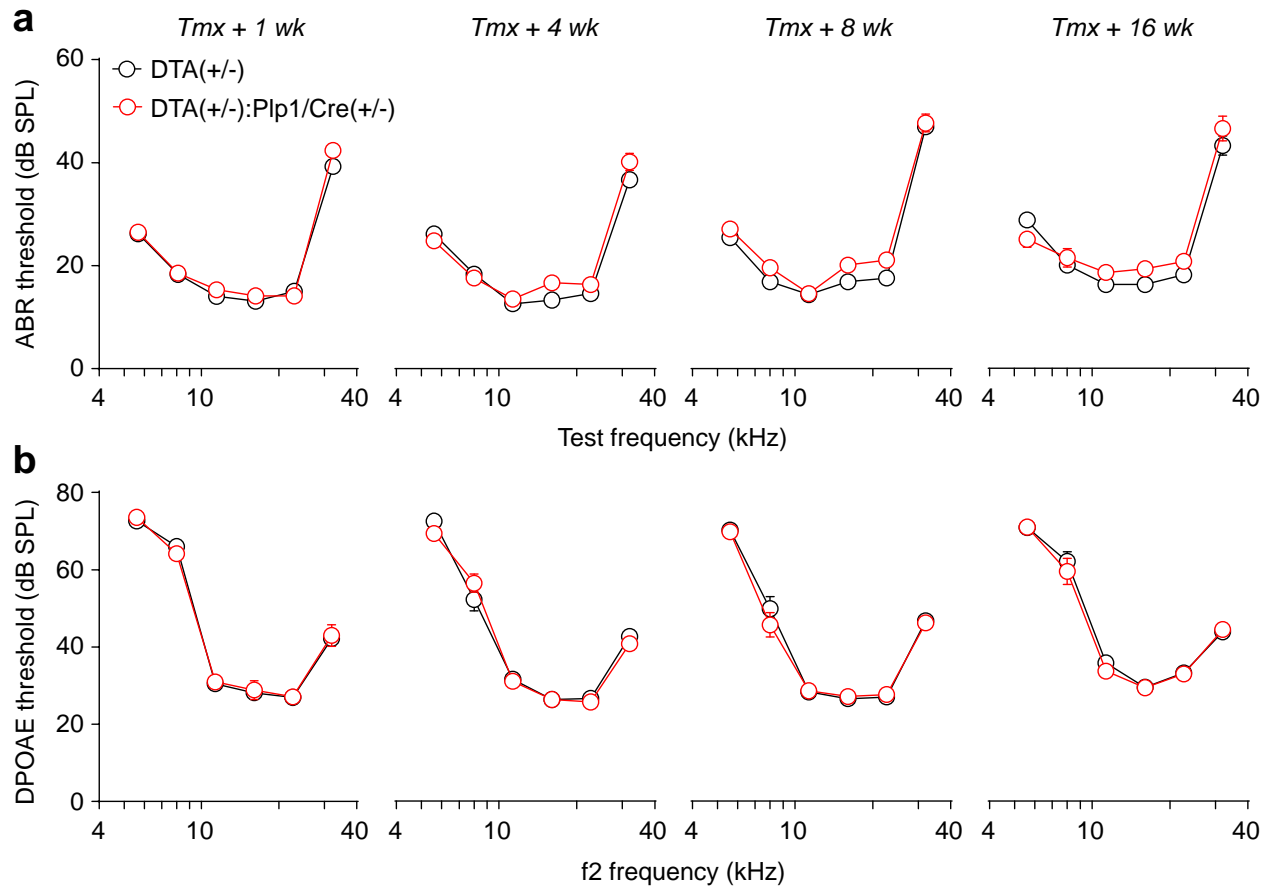

**Supplementary Figure 3: Transient Schwann cell ablation does not affect auditory**

**thresholds.** Mice were injected with tamoxifen from P21-23 and ABR and DPOAE tests were performed 1, 4, 8 and 16 weeks later. ABR thresholds (**a**) and DPOAE thresholds (**b**) are unaffected at all timepoints in *DTA(+/-):Plp1/Cre(+/-)* mice at all frequencies. Tmx + 1 wk,  $n = 17-21$ ; Tmx + 4 wk,  $n = 16-20$ ; Tmx + 8 wk,  $n = 10-14$ ; Tmx + 16 wk,  $n = 7-8$  of each animal group.

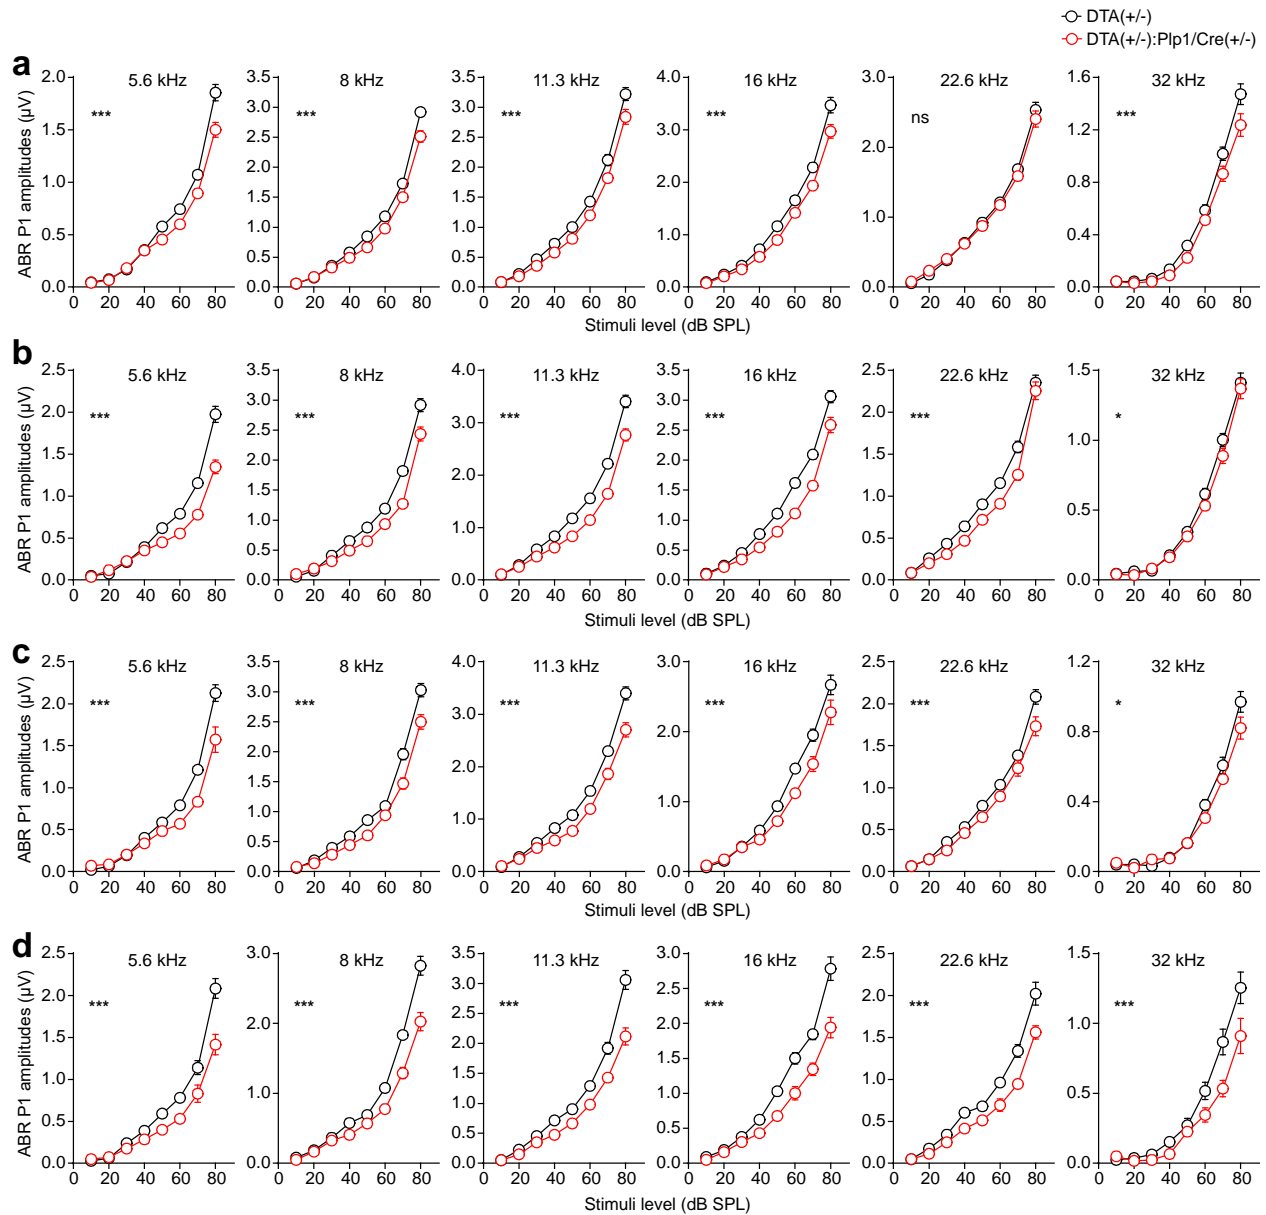

**Supplementary Figure 4: Transient Schwann cell ablation impairs suprathreshold ABR**

**peak 1 amplitude.** Mice were injected with tamoxifen from P21-23 and ABR tests were performed (a) 1 week, (b) 4 weeks, (c) 8 weeks and (d) 16 weeks later. ABR peak 1 amplitude (μV) was plotted against the stimuli level at 5.6, 8, 11.3, 16, 22.6 and 32 kHz. Tmx + 1 wk,  $n = 17-21$ ; Tmx + 4 wk,  $n = 16-20$ ; Tmx + 8 wk,  $n = 10-14$ ; Tmx + 16 wk,  $n = 7-8$  of each animal group. \*  $p < 0.05$ ; \*\*\*  $p < 0.001$  by two-way ANOVA.

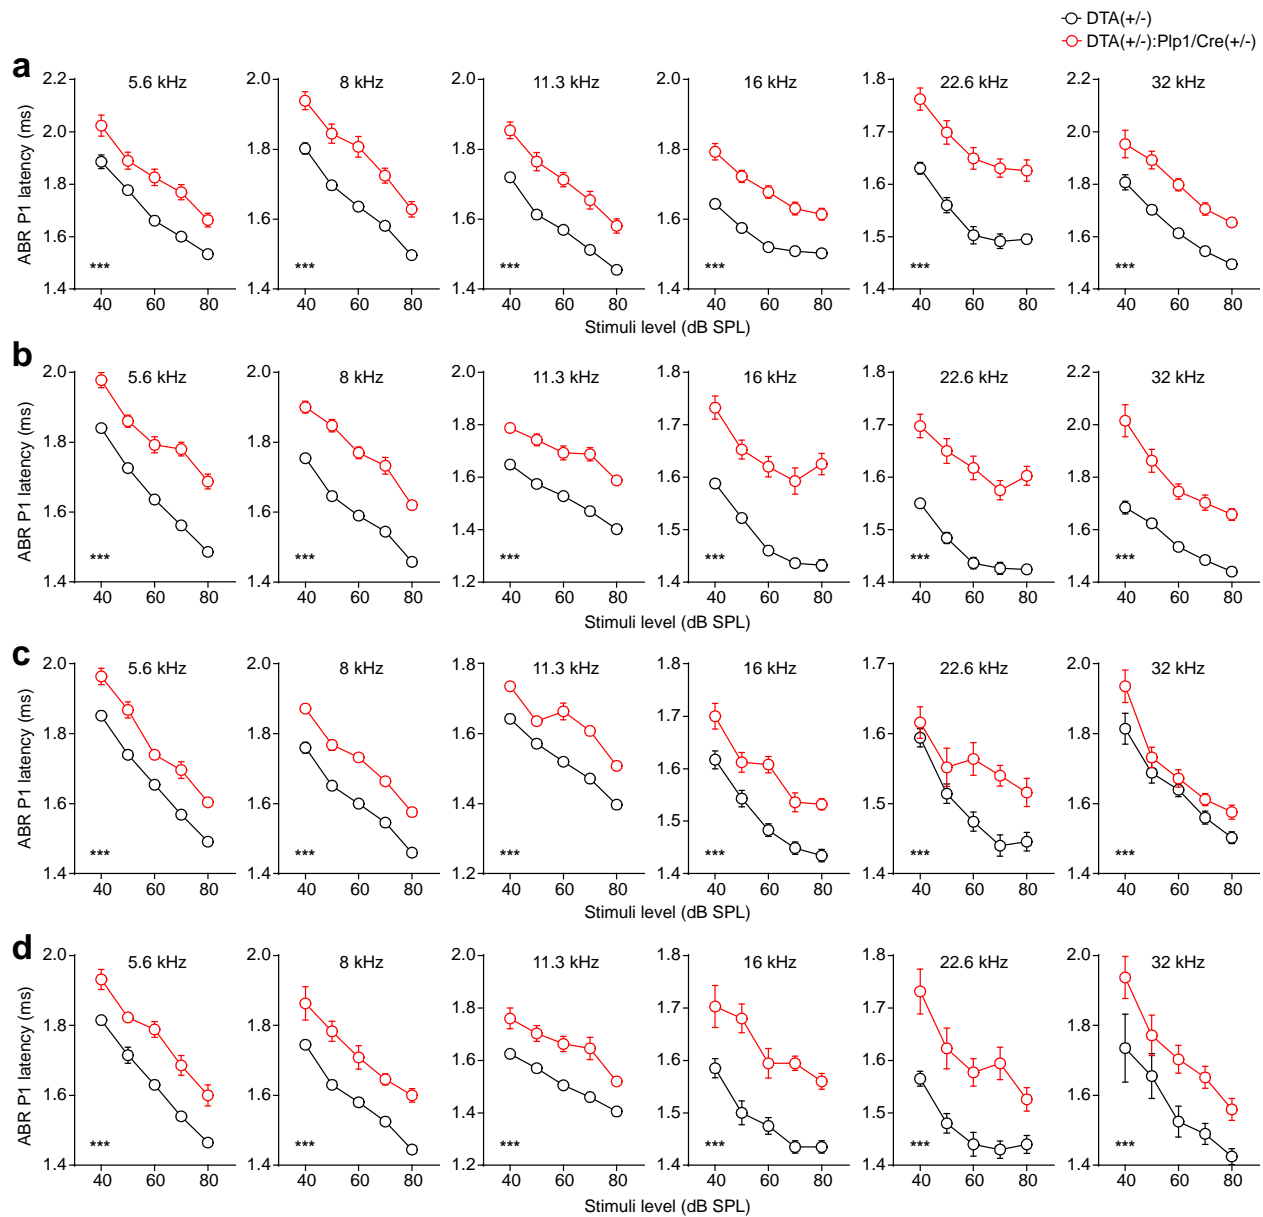

**Supplementary Figure 5: Transient Schwann cell ablation impairs suprathreshold ABR**

**peak 1 latency.** Mice were injected with tamoxifen from P21-23 and ABR tests were performed (a) 1 week, (b) 4 weeks, (c) 8 weeks and (d) 16 weeks later. ABR peak 1 latency (ms) was plotted against the stimuli level at 5.6, 8, 11.3, 16, 22.6 and 32 kHz. Tmx + 1 wk,  $n = 17-21$ ; Tmx + 4 wk,  $n = 16-20$ ; Tmx + 8 wk,  $n = 10-14$ ; Tmx + 16 wk,  $n = 7-8$  of each animal group. \*\*\*  $p < 0.001$  by two-way ANOVA.



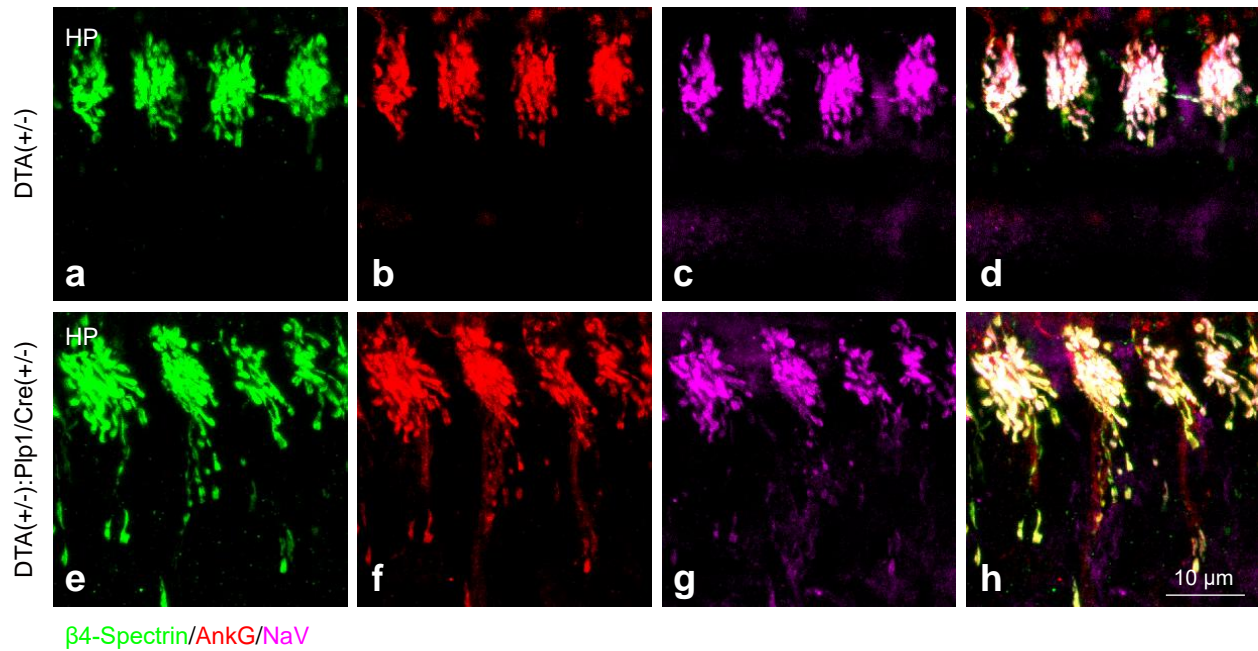

**Supplementary Figure 6: Disruption of heminode organization after transient Schwann cell ablation.** (a-h) Immunostaining for  $\beta$ 4-spectrin (a,e), ankyrin G (b,f) and sodium channels (c,g) shows disorganization of heminodes in *DTA(+/-):Plp1/Cre(+/-)* cochlea (e-h) but not in control cochlea (a-d) 16 weeks after tamoxifen induction.

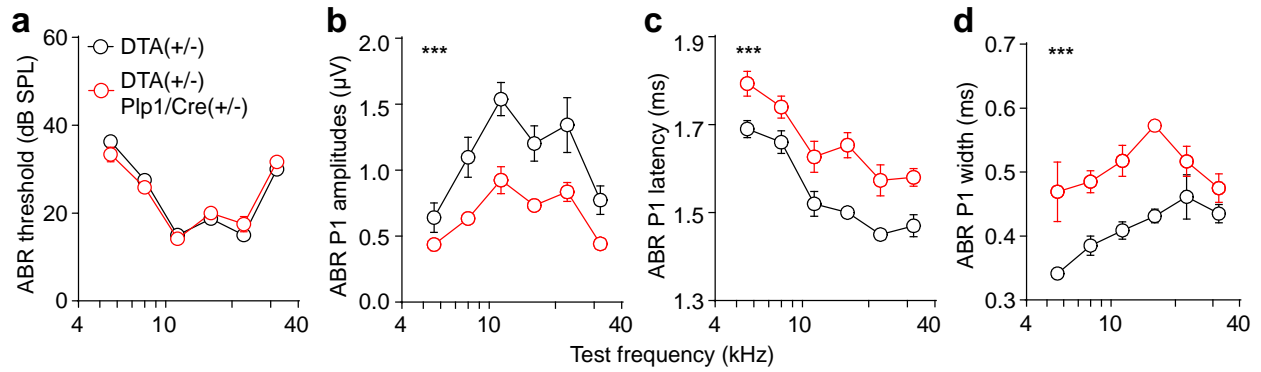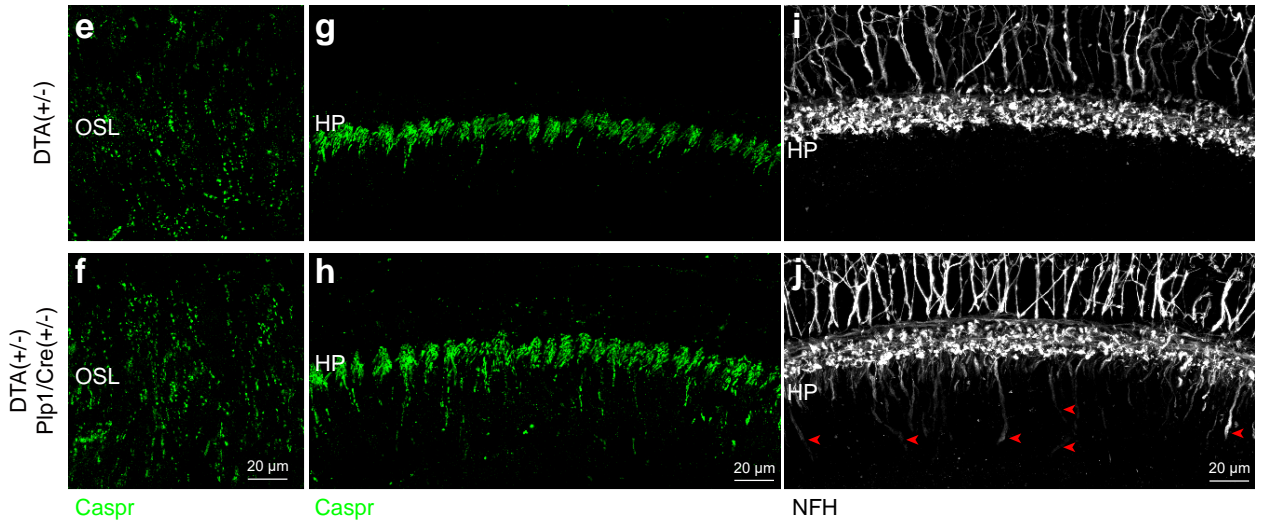

**Supplementary Figure 7: Permanent auditory impairment and heminode disruption after transient Schwann cell ablation.** *DTA(+/-):Plp1/Cre(+/-)* mice present with hidden hearing loss one year after tamoxifen induction as illustrated by the presence of normal ABR thresholds (a) but reduced ABR P1 amplitudes (b), increased ABR P1 latency (c) and increased ABR P1 width (d);  $n = 4-6$  of each group. \*\*\*  $p < 0.001$  by two-way ANOVA. Immunostaining show that nodes of Ranvier appear normal in the osseous spiral lamina (OSL) in *DTA(+/-):Plp1/Cre(+/-)* cochlea (e, f) 1 year after tamoxifen induction. In contrast, heminode disruption (h) and dysmyelinated nerve fibers remain present by the habenula perforata (j, arrow heads). (g, i) show images from control mice for comparison.

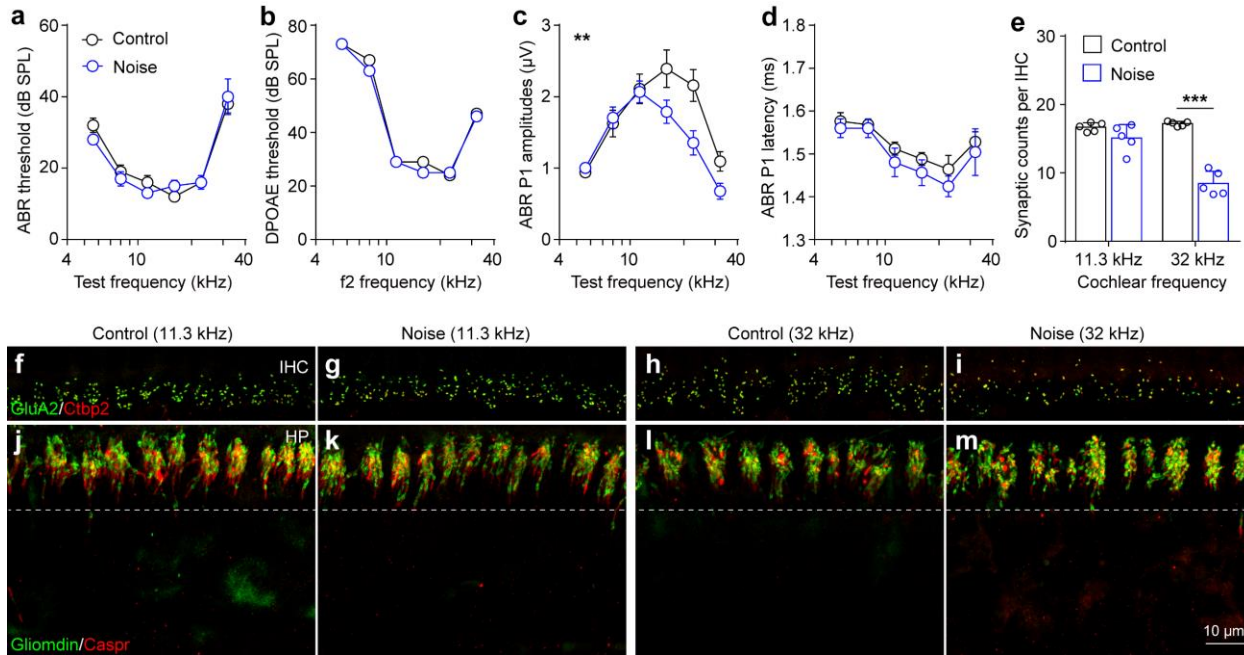

**Supplementary Figure 8: Noise exposure that caused synaptopathic hidden hearing loss does not disrupt heminodes.** (a-d) Mice exposed to 8-16 kHz noise at 100 dB SPL for 2 h display hidden hearing loss 2 weeks later as illustrated by the reduced ABR P1 amplitudes (c) without changes in ABR thresholds (a), DPOAE thresholds (b) or ABR P1 latencies (d). Sixteen week old wildtype FVB/N mice were used;  $n = 5$  of each group. \*\*  $p < 0.01$  by two-way ANOVA. (e) Noise exposure results in inner hair cell synapse loss at 32 kHz but not 11.3 kHz cochlear regions. f-i Representative images of ribbon synapse immunostaining of groups in e.  $n = 5$  of each animal group. \*\*\*  $p < 0.001$  by two-way ANOVA followed by Bonferroni's post-tests. (j-m) Representative images of nodal markers showing normal heminodes in noise-exposed mice.
